# Supplementary material for: Adapting reintroduction tactics in successive trials increases the likelihood of establishment for an endangered carnivore in a fenced sanctuary
Source: PubMed Central journal article supplement (PMC7323978; doi:10.1371/journal.pone.0234455), 2020-06-29
Supplement: pone.0234455.s001.pdf [file pone.0234455.s001.pdf]

S1 Table. Reintroduction history of the founder eastern quolls (*Dasyurus viverrinus*) translocated to Mulligans Flat Woodland Sanctuary, ACT Australia in 2016-18.

| ID   | Sex | Origin  | Location            | Trial | Release date | Release location     | Release method | Release condition | Release weight (kg) | Fate     | Escapes (n) | Cause of death                  | Pouch young (n) | Fixes (n) | Den sharing (%) |
|------|-----|---------|---------------------|-------|--------------|----------------------|----------------|-------------------|---------------------|----------|-------------|---------------------------------|-----------------|-----------|-----------------|
| 8C2B | F   | Captive | MtR                 | 1     | 02/03/16     | Pipeline Road        | Bag            | Good              | 0.835               | Deceased | 2           | Escaped, retrieved              | 6               | 33        | 6               |
| 90FC | M   | Captive | MtR                 | 1     | 29/02/16     | Main Mulligans Track | Bag            | Excellent         | 1.215               | Deceased | 1           | Escaped, predated (fox)         |                 | 1         | 100             |
| 8FC0 | F   | Captive | MtR                 | 1     | 29/02/16     | Mustering Track      | Bag            | Good              | 0.785               | Survived | 0           |                                 | 7               | 39        | 26              |
| 0257 | M   | Captive | MtR                 | 1     | 01/03/16     | Old Coach Road       | Bag            | Good              | 1.120               | Deceased | 1           | Escaped, died under observation |                 | 29        | 10              |
| 78F7 | F   | Captive | MtR                 | 1     | 29/02/16     | Dam Paddock          | Bag            | Good              | 0.755               | Deceased | 2           | Escaped, died under observation | 0               | 1         | 0               |
| 91DB | M   | Captive | MtR                 | 1     | 02/03/16     | Pipeline Road        | Bag            | Good              | 1.105               | Survived | 0           |                                 |                 | 39        | 5               |
| 803C | F   | Wild    | TAS (Pelverata)     | 1     | 29/02/16     | Mustering Track      | Bag            | Good              | 1.085               | Survived | 0           |                                 | 0               | 40        | 10              |
| 8244 | M   | Wild    | TAS (Cygnet)        | 1     | 29/02/16     | Main Mulligans Track | Bag            | Excellent         | 1.245               | Deceased | 0           | Misadventure within sanctuary   |                 | 40        | 10              |
| F0C7 | F   | Wild    | TAS (Mt River)      | 1     | 29/02/16     | Main Mulligans Track | Bag            | Fair              | 0.880               | Survived | 0           |                                 | 5               | 40        | 0               |
| 8258 | M   | Wild    | TAS (Uxbridge)      | 1     | 01/03/16     | Old Coach Road       | Bag            | Good              | 1.220               | Deceased | 3           | Misadventure within sanctuary   |                 | 1         | 0               |
| 81C5 | F   | Wild    | TAS (Geeveston)     | 1     | 01/03/16     | Dam Paddock          | Bag            | Excellent         | 0.875               | Deceased | 3           | Escaped, retrieved              | 0               | 1         | 0               |
| F2F4 | M   | Wild    | TAS (Lonna Vale)    | 1     | 01/03/16     | Main Mulligans Track | Bag            | Excellent         | 1.430               | Deceased | 0           | Escaped, died under observation |                 | 1         | 0               |
| 8DB3 | M   | Wild    | TAS (Pine Tiers)    | 1     | 02/03/16     | Pipeline Road        | Bag            | Excellent         | 1.420               | Deceased | 0           | Transferred, poor condition     |                 | 40        | 30              |
| 3AA6 | M   | Wild    | TAS (14 Mile Road)  | 1     | 02/03/16     | Pipeline Road        | Bag            | Fair              | 0.825               | Deceased | 1           | Escaped, predated (fox)         |                 | 8         | 13              |
| C682 | F   | Captive | MtR                 | 2     | 11/07/17     | Central MFWS         | Den box        | Good              | 0.786               | Survived | 0           |                                 | 6               | 42        | 7               |
| 3051 | F   | Captive | MtR                 | 2     | 28/06/17     | Central MFWS         | Den box        | Good              | 0.960               | Survived | 0           |                                 | 6               | 42        | 12              |
| 5340 | F   | Captive | MtR                 | 2     | 24/06/17     | Central MFWS         | Den box        | Good              | 0.955               | Deceased | 1           | Escaped, retrieved              | 0               | 8         | 0               |
| 1BEF | F   | Captive | MtR                 | 2     | 26/06/17     | Central MFWS         | Den box        | Good              | 0.830               | Survived | 0           |                                 | 6               | 42        | 31              |
| 8849 | F   | Captive | MtR                 | 2     | 26/06/17     | Central MFWS         | Den box        | Good              | 0.880               | Survived | 0           |                                 | 4               | 42        | 43              |
| 1801 | F   | Captive | MtR                 | 2     | 05/07/17     | Central MFWS         | Den box        | Good              | 0.750               | Survived | 0           |                                 | 0               | 41        | 80              |
| E384 | F   | Wild    | TAS (Lonna Vale)    | 2     | 11/07/17     | Central MFWS         | Den box        | Fair              | 0.746               | Survived | 0           |                                 | 6               | 42        | 12              |
| DDE1 | F   | Wild    | TAS (Grove)         | 2     | 13/07/17     | Central MFWS         | Den box        | Fair              | 0.890               | Survived | 0           |                                 | 6               | 42        | 50              |
| D6C1 | F   | Wild    | TAS (Grove)         | 2     | 13/07/17     | Central MFWS         | Den box        | Good              | 0.910               | Survived | 0           |                                 | 6               | 41        | 90              |
| F9FC | F   | Wild    | TAS (Russell Falls) | 2     | 17/07/17     | Central MFWS         | Den box        | Good              | 0.845               | Survived | 0           |                                 | 2               | 42        | 2               |
| E09E | F   | Wild    | TAS (Russell Falls) | 2     | 17/07/17     | Central MFWS         | Den box        | Good              | 0.760               | Deceased | 2           | Escaped, retrieved              | 6               | 1         | 100             |
| D897 | F   | Wild    | TAS (Geeveston)     | 2     | 19/07/17     | Central MFWS         | Den box        | Good              | 0.885               | Deceased | 1           | Escaped, predated (fox)         | 6               | 7         | 0               |
| 1715 | F   | Wild    | TAS (Geeveston)     | 2     | 19/07/17     | Central MFWS         | Den box        | Good              | 0.890               | Survived | 0           |                                 | 5               | 42        | 10              |
| 3CAB | F   | Wild    | TAS (Blessington)   | 3     | 27/06/18     | Central MFWS         | Den box        | Good              | 0.960               | Survived | 0           |                                 | 6               | 35        | 11              |
| A98C | F   | Wild    | TAS (Scamander)     | 3     | 27/06/18     | Central MFWS         | Den box        | Excellent         | 1.070               | Deceased | 1           | Escaped, predated (fox)         | 5               | 28        | 14              |
| 414B | F   | Wild    | TAS (Blessington)   | 3     | 27/06/18     | Central MFWS         | Den box        | Good              | 0.900               | Survived | 0           |                                 | 4               | 41        | 29              |
| 4C40 | F   | Wild    | TAS (Scamander)     | 3     | 27/06/18     | Central MFWS         | Den box        | Good              | 0.910               | Survived | 0           |                                 | 6               | 29        | 10              |
| 3E0D | F   | Wild    | TAS (Fingal Forest) | 3     | 28/06/18     | Central MFWS         | Den box        | Excellent         | 1.100               | Survived | 0           |                                 | 6               | 41        | 5               |
| D0AE | F   | Wild    | TAS (Gladstone)     | 3     | 05/07/18     | Central MFWS         | Den box        | Excellent         | 1.180               | Survived | 0           |                                 | 5               | 42        | 88              |
| A8AD | F   | Wild    | TAS (Fingal Forest) | 3     | 05/07/18     | Central MFWS         | Den box        | Good              | 0.990               | Survived | 0           |                                 | 6               | 33        | 70              |
| A810 | F   | Wild    | TAS (Gladstone)     | 3     | 05/07/18     | Central MFWS         | Den box        | Good              | 1.070               | Survived | 0           |                                 | 5               | 42        | 12              |

‘MtR’ refers to Mt Rothwell Biodiversity Interpretation Centre, and ‘TAS’ refers to Tasmania.

‘Bag’ refers to immediate releases from a cotton bag, and ‘den box’ releases were delayed.

‘Fixes’ is the number of radiotracking records, and ‘den sharing’ is % fixes found den sharing.

Escapee (dispersing outside the exclusion fence) and transferred animals were considered deceased for analyses.
